# Supplementary material for: Effects of the Protein Concentration and Quality in a Canned Diet on the Fecal Microbiota of Healthy Adult Cats
Source: MDPI journal article supplement (doi:10.3390/metabo12020105), 2022-01-24
Supplement: s1 [file s1]

**Table S1:** Primers used for the qPCR to quantitatively detect selected bacterial groups and species in the feces of cats fed diets with varying protein concentrations and qualities.

| Bacterial group/species                     | Primer       | Sequence                            | Base pairs | Temperature (°C) | Reference                                                                |
|---------------------------------------------|--------------|-------------------------------------|------------|------------------|--------------------------------------------------------------------------|
| <i>Bacteroides/Prevotella/Porphyromonas</i> | BPP1         | 5'-GGT GTC GGC TTA AGT GCC AT-3'    | 147        | 55               | [1]                                                                      |
|                                             | BPP2         | 5'-CGG AYG TAA GGG CCG TGC-3'       |            |                  |                                                                          |
| <i>Bifidobacterium spp.</i>                 | g-BIFID-F    | 5'-TCG CGT CYG GTG TGA AAG-3'       | 251        | 58               | [1]                                                                      |
|                                             | g-BIFID-R    | 5'-CCA CAT CCA GCR TCC AC-3'        |            |                  |                                                                          |
| <i>Clostridium coccoides cluster XIVa</i>   | g-Ccoc-F     | 5'-AAA TGA CGG TAC CTG ACT AA-3'    | 455        | 60               | [2]                                                                      |
|                                             | g-Ccoc-R     | 5'-CTT TGA GTT TCA TTC TTG CGA A-3' |            |                  |                                                                          |
| <i>Clostridium cluster I</i>                | CI-F1        | 5'-TAC CHR AGG AGG AAG CCA C-3'     | 239        | 63               | [3]                                                                      |
|                                             | CI-R2        | 5'-GTT CTT CCT AAT CTC TAC GCA T-3' |            |                  |                                                                          |
| <i>Clostridioides difficile</i>             | Cdiff-16S-1f | 5'-TTG AGC GAT TTA CTT CGG TAA      | 174        | 58               | Developed in the Institute of Animal Nutrition, Freie Universität Berlin |
|                                             | Cdiff-16S-1r | AGA-3'                              |            |                  |                                                                          |
| <i>Clostridium leptum cluster IV</i>        | sg-Clept-F   | 5'-CCA TCC TGT ACT GGC TCA CCT-3'   | 253        | 60               | [4]                                                                      |
|                                             | sg-Clept-R   | 5'-GCA CAA GCA GTG GAG T-3'         |            |                  |                                                                          |
| <i>Clostridium perfringens</i>              | Cpa1a        | 5'-AGG CGC TTA TTT GTG CTA CG-3'    | 90         | 48               | Developed in the Institute of Animal Nutrition, Freie Universität Berlin |
|                                             | Cpa1b        | 5'-TCA ATC TTT CCA TCC CAA GC-3'    |            |                  |                                                                          |
| <i>Enterobacteriaceae</i>                   | EntqPCR3417f | 5'-GTB TCD CCR CGC AGR C-3'         | 454        | 55               | Developed in the Institute of Animal Nutrition, Freie Universität Berlin |
|                                             | EntqPCR3852r | 5'-TGC GYC TGG TRA TCT A-3'         |            |                  |                                                                          |
| <i>Escherichia coli/Hafnia/Shigella</i>     | Entero-F     | 5'-GTT AAT ACC TTT GCT CAT TGA-3'   | 354        | 55               | [5]                                                                      |
|                                             | Entero-R     | 5'-ACC AGG GTA TCT AAT CCT GTT-3'   |            |                  |                                                                          |
| <i>Lactobacillus spp.</i>                   | Lac1         | 5'-AGC AGT AGG GAA TCT TCC A-3'     | 351        | 58               | [1]                                                                      |
|                                             | Lac2         | 5'-CAC CGC TAC ACA TGG AG-3'        |            |                  |                                                                          |
| <i>Salmonella spp.</i>                      | QVR133       | 5'-GAA GCA GCG CCT GTA AAA TC-3'    | 20         | 60               | Developed in the Institute of Animal Nutrition, Freie Universität Berlin |
|                                             | QVR134       | 5'-TGG CTG TGG TGC AAA ATA TC-3'    |            |                  |                                                                          |

### References cited in this Supplementary Material

1. Rinttilä, T.; Kassinen, A.; Malinen, E.; Krogius, L.; Palva, A. Development of an extensive set of 16S rDNA-targeted primers for quantification of pathogenic and indigenous bacteria in faecal samples by real-time PCR. *J. Appl. Microbiol.* **2004**, *97*, 1166–1177.
2. Matsuki, T.; Watanabe, K.; Fujimoto, J.; Miyamoto, Y.; Takada, T.; Matsumoto, K.; Oyaizu, H.; Tanaka, R. Development of 16S rRNA-gene-targeted group-specific primers for the detection and identification of predominant bacteria in human feces. *Appl. Environ. Microbiol.* **2002**, *68*, 5445–5451.
3. Song, Y.; Liu, C.; Finegold, S.M. Real-Time PCR quantitation of clostridia in feces of autistic children. *Appl. Environ. Microbiol.* **2004**, *70*, 6459–6465.
4. Matsuki, T.; Watanabe, K.; Fujimoto, J.; Takada, T.; Tanaka, R. Use of 16S rRNA gene-targeted group-specific primers for real-time PCR analysis of predominant bacteria in human feces. *Appl. Environ. Microbiol.* **2004**, *70*, 7220–7228.
5. Malinen, E.; Kassinen, A.; Rinttilä, T.; Palva, A. Comparison of real-time PCR with SYBR Green I or 5'-nuclease assays and dot-blot hybridization with rDNA-targeted oligonucleotide probes in quantification of selected faecal bacteria. *Microbiology* **2003**, *149*, 269–277.
